# Supplementary material for: Ancient co-option of an amino acid ABC transporter locus in Pseudomonas syringae for host signal-dependent virulence gene regulation
Source: PubMed Central journal article supplement (PMC7386598; doi:10.1371/journal.ppat.1008680), 2020-07-16
Supplement: ppat.1008680.s016.pdf [file ppat.1008680.s016.pdf]

**S1 Table. Bacterial strains and plasmids used in this study.**

| Strains and plasmids             | Genotype and relevant characteristics <sup>#</sup>                                               | Reference or source        |
|----------------------------------|--------------------------------------------------------------------------------------------------|----------------------------|
| <b>Strains</b>                   |                                                                                                  |                            |
| <i>P. syringae</i>               |                                                                                                  |                            |
| DC3000                           | Wild-type DC3000. Rif <sup>r</sup>                                                               | Lab collection             |
| $\Delta aauS$                    | Strain DC3000 containing a 1580bp in-frame deletion of <i>aauS</i> in the chromosome             | This study                 |
| $\Delta aauR$                    | Strain DC3000 containing a 1070bp in-frame deletion of <i>aauR</i> in the chromosome             | This study                 |
| $\Delta aauS \Delta aauR$        | Strain DC3000 containing a 3219bp deletion of <i>aauS</i> and <i>aauR</i> in the chromosome      | This study                 |
| $\Delta aatJ$                    | Strain DC3000 containing a 793bp in-frame deletion of <i>aatJ</i> in the chromosome              | This study                 |
| $\Delta aatP$                    | Strain DC3000 containing a 690bp in-frame deletion of <i>aatP</i> in the chromosome              | This study                 |
| $\Delta aatQM$                   | Strain DC3000 containing a 1300bp deletion of <i>aatQ</i> and <i>aatM</i> in the chromosome      | This study                 |
| $\Delta Rbm$                     | Strain DC3000 containing a deletion of the AauR-binding site Rbm within the HrpR promoter region | This study                 |
| B728a                            | Wild-type. Rif <sup>r</sup>                                                                      | Lab collection             |
| B728a_ $\Delta aauR$             | Strain B728a containing a 1297bp in-frame deletion of <i>aauR</i> in the chromosome              | This study                 |
| <i>E. coli</i>                   | <i>recA pro hsdR</i> <sup>M+</sup> RP4 2-Tc::Mu-Km::Tn7 Sm <sup>r</sup> Tp <sup>r</sup>          |                            |
| <b>Plasmids</b>                  |                                                                                                  |                            |
| pEX18Km                          | Gene replacement vector with MCS from pUC18, <i>sacB</i> <sup>+</sup> Km <sup>r</sup>            | (Hoang <i>et al.</i> 1998) |
| pRK600                           | Helper plasmid used in tri-parental matting. Cm <sup>r</sup>                                     |                            |
| p18Km- $\Delta aauS$             | pEX18Km with a deletion of <i>aauS</i> (PSPTO_4175)                                              | This study                 |
| p18Km- $\Delta aauR$             | pEX18Km with a deletion of <i>aauR</i> (PSPTO_4176)                                              | This study                 |
| p18Km- $\Delta aauS \Delta aauR$ | pEX18Km with a deletion of both <i>aauS</i> (PSPTO_4175) and <i>aauR</i> (PSPTO_4176)            | This study                 |
| p18Km- $\Delta aatJ$             | pEX18Km with a deletion of <i>aatJ</i> (PSPTO_4171)                                              | This study                 |
| p18Km- $\Delta aatP$             | pEX18Km with a deletion of <i>aatP</i> (PSPTO_4174)                                              | This study                 |
| p18Km- $\Delta aatQM$            | pEX18Km with a deletion of both <i>aatQ</i> (PSPTO_4172) and <i>aatM</i> (PSPTO_4173)            | This study                 |

|                                      |                                                                                                                                                                                                                     |                             |
|--------------------------------------|---------------------------------------------------------------------------------------------------------------------------------------------------------------------------------------------------------------------|-----------------------------|
| p18Km-ΔRbm                           | pEX18Km with a deletion of AauR-binding site Rbm in the promoter region of <i>hrpR</i>                                                                                                                              | This study                  |
| p18Km-ΔaauR_B728a                    | pEX18Km with a deletion of <i>aauR</i> (P <sub>syr_3913</sub> )                                                                                                                                                     | This study                  |
| pPROBE-NT                            | pBBR1, containing promoterless <i>gfp</i> , Km <sup>r</sup>                                                                                                                                                         | (Miller <i>et al.</i> 2000) |
| phrpRS <sub>promoter</sub> -gfp      | pPROBE-NT reporter construct containing the intergenic region between <i>hrpR</i> and <i>hrpH</i> including the promoter of <i>hrpRS</i> fused with a promoterless <i>gfp</i>                                       | This study                  |
| phrpR <sub>promoter</sub> (ΔRbm)-gfp | pPROBE-NT reporter construct containing the intergenic region between <i>hrpR</i> and <i>hrpH</i> including a deletion of AauR-binding site Rbm in the promoter of <i>hrpR</i> fused with a promoterless <i>gfp</i> | This study                  |
| phrpL <sub>promoter</sub> -gfp       | pPROBE-NT reporter construct containing the intergenic region between <i>hrpL</i> and <i>hrpJ</i> including the promoter of <i>hrpL</i> fused with a promoterless <i>gfp</i>                                        | (Yan <i>et al.</i> 2019)    |
| pavrRpm1 <sub>promoter</sub> -gfp    | Reporter construct containing <i>avrRpm1</i> fused with a C-terminal hemagglutinin tag followed by a promoterless <i>gfp</i> , with both genes driven by the native <i>avrRpm1</i> promoter in vector pBBR1MCS-2.   | (Chang <i>et al.</i> 2005)  |
| paatJ <sub>promoter</sub> -gfp       | pPROBE-NT reporter construct containing the promoter of <i>aatJ</i> fused with a promoterless <i>gfp</i> .                                                                                                          | This study                  |
| pME6010                              | pACYC177-pVS1 <i>E. coli</i> and <i>Pseudomonas</i> spp. shuttle vector, Tc <sup>r</sup>                                                                                                                            | (Heeb <i>et al.</i> 2000)   |
| pME6010-aauS                         | pME6010 containing an intact <i>aauS</i> gene, used to restore the mutation of <i>aauS</i> in DC3000. Tc <sup>r</sup>                                                                                               | This study                  |
| pME6010-aauR                         | pME6010 containing an intact <i>aauR</i> gene, used to restore the mutation of <i>aauR</i> in DC3000. Tc <sup>r</sup>                                                                                               | This study                  |
| pME6010-aatJ                         | pME6010 containing an intact <i>aatJ</i> gene, used to restore the mutation of <i>aatJ</i> in DC3000. Tc <sup>r</sup>                                                                                               | This study                  |
| pET28a:aauR                          | Expression of recombinant AauR in <i>E. coli</i>                                                                                                                                                                    | This study                  |

#: Rif<sup>r</sup>: rifampicin; Tc<sup>r</sup>, tetracycline resistance; Km<sup>r</sup>, kanamycin resistance; Cm<sup>r</sup>, chloramphenicol resistance
