# Supplementary material for: Ancient co-option of an amino acid ABC transporter locus in Pseudomonas syringae for host signal-dependent virulence gene regulation
Source: PubMed Central journal article supplement (PMC7386598; doi:10.1371/journal.ppat.1008680), 2020-07-16
Supplement: ppat.1008680.s017.pdf [file ppat.1008680.s017.pdf]

**S2 Table. Sequences of oligonucleotides used in this study.**

| <b>Oligonucleotides</b>    | <b>DNA sequences (5' to 3')*</b>                             |
|----------------------------|--------------------------------------------------------------|
| aaus-F1                    | atagaaTTCCGCACTTGAGCATCGTCG                                  |
| aaus_OP_R1                 | GAA CAT GGC GTC CAG TGC ATT GCG CAT TTC ATC ACA<br>GTC GTC C |
| aaus_OP_F1                 | GGACGACTGTGATGAAATGCGCAATGCACTGGACGCCATG<br>TTC              |
| aaus_R1                    | tataagCTTGAGACGGCTCAGCAGCTC                                  |
| aaur_F1                    | atagaattCAATGCACTGGACGCCATGTTC                               |
| aaur_OP_R1                 | GAC CTT GTC AAA CAG TGT GGT CCT TGA GAC GGC TCA<br>GCA GCT C |
| aaur_OP_F1                 | GAGCTGCTGAGCCGTCTCAAGGACCACACTGTTTGACAAG<br>GTC              |
| aaur_R1                    | tataagCTTCCAGTCACCAGACCCTGG                                  |
| aausR_OP_F1                | GGACGACTGTGATGAAATGCGGACCACACTGTTTGACAAG<br>GTC              |
| aausR_OP_R1                | GAC CTT GTC AAA CAG TGT GGT CCG CAT TTC ATC ACA<br>GTC GTC C |
| aatJ-F1                    | atagaatTCAGCAGCTATATGGACACCG                                 |
| aatJ_OP_R1                 | GGTTGAACCGCTTACTCAGGCTGGCCGAGGGTGATAGTGC                     |
| aatJ_OP_F1                 | GCACTATCACCCCTCGGCCAGCCTGAGTAAGCGGTTCAACC                    |
| aatJ-R1                    | tagaagCTTGTTTCGACAGACCCGTGCAG                                |
| aatP_F1                    | atagaaTTCGCTCGATCCCCTGCTG                                    |
| aatP_OP_R1                 | GCTTGCTTAGTGCTGGAGAATCACTTGTTGACGTTCTTGAT<br>GG              |
| aatP_OP_F1                 | CCATCAAGAACGTCAACAAGTGATTCTCCAGCACTAAGCA<br>AGC              |
| aatP_R1                    | tagaagCTTACCCTGATAACTGTCCGGC                                 |
| aatQM_F1                   | tagaaGCTTTCATGATGGACGACGC                                    |
| aatQM_OVLP_R1              | GCAAAGCTGATCGTGAAATACCGGTGGACTTGAAGAACAC<br>G                |
| aatQM_OVLP_F1              | CGTGTTCTTCAAGTCCACCGGTATTTACGATCAGCTTTGC                     |
| aatQM_R1                   | atagaaTTCGTGGAACAGCATGACCAC                                  |
| B728a_aauR_F3_OVL<br>Pf_18 | cctgcaggtcactctagagAACTGAGCAAGGCTGTTCGATG                    |
| B728a_aauR_R3_OV<br>LP     | CGCAGTGCTCAAAGCCCGTAAGGTCGCTGTTTATGCTCATG<br>G               |
| B728a_aauR_F4_OVL<br>P     | CCATGAGCATAAACAGCGACCTTACGGGCTTTGAGCACTG<br>CG               |

|                            |                                                        |
|----------------------------|--------------------------------------------------------|
| B728a_aauR_R4_OV<br>LPr_18 | tgattacgaattcgagctcgTTCAGCGACCTGAAAGACCC               |
| hrpR-F1_pro                | gcctgcaggtcgactctagaGCTTACAAACCGGATACAGTTGCC           |
| hrpR-R1_pro                | gaataagccgaattcgagctcgCTCTCATGGTGGGTGGCAAGC            |
| hrpR-F1                    | tataaGCTTACAAACCGGATACAGTTGCC                          |
| hrpR-R1                    | ataggtacCTCTCATGGTGGGTGGCAAGC                          |
| hrpR_F6_OVLP               | GTCTAAGCAGGTGGGCTTTTGTGCGATGATGACTAAATGC<br>C          |
| hrpR_R7_OVLP               | GGCATTTAGTCATCATCGCACAAAAGCCCACCTGCTTAGA<br>C          |
| hrpR_F6_OVLP               | GTCTAAGCAGGTGGGCTTTTGTGCGATGATGACTAAATGC<br>C          |
| hrpR_R6                    | tagaagctTCAAAGCAGCTGTGATCCG                            |
| hrpR_F7                    | atagaattcGTTTTTGCCAGTGATCCACG                          |
| hrpR_R7_OVLP               | GGCATTTAGTCATCATCGCACAAAAGCCCACCTGCTTAGA<br>C          |
| aatJ_F2                    | TCAAAGACATCCTCTGGCGC                                   |
| aatJ_R2                    | atagaattCAGATGGGGAACGATACGC                            |
| hrpR-F1_pro                | gcctgcaggtcgactctagaGCTTACAAACCGGATACAGTTGCC           |
| pME6010-F1                 | TGGTACCCGGGAGCTCGAATTC                                 |
| pME6010-R1                 | GCATCGATAGATCTCGAGCAAGACG                              |
| pME6010-F2                 | GATCCAACCCCTCCGCTGCTATAG                               |
| pME6010-R2                 | CTATAGCAGCGGAGGGGTTGGATC                               |
| #4176-F                    | CTCGAGATCTATCGATGCCGACATGAGAAGAAAGCC                   |
| #4176-R                    | TCGAGCTCCCGGGTACCATCAAAGCCCATATTTCTTG                  |
| #4171-F                    | ACGGGAAACGTCTTGCCCTCTCATTGCGGCTCTATC                   |
| #4171-R                    | CATGCATCGATAGATCATCAGTTCAGGGTGGTTGAAC                  |
| #4175-F                    | ACGGGAAACGTCTTGCAACCCTCTCAGGCAGCTGTTC                  |
| #4175-R                    | CATGCATCGATAGATCAGTTCGCTGTTGATGCTCATG                  |
| pET28a_F                   | CATGGTATATCTCCTTCTTAAAG                                |
| aauR_28a_F                 | CTTTAAGAAGGAGATATACCATGAGCATCAACAGCGAACT<br>C          |
| aauR_28a_R                 | GTGCTCGAGTGCGGCCGCAAGAAGCCCATATTTCTTGACC<br>TTG        |
| attJ_F                     | CCTGAATATTCGACTGCATTCGGCTTTCCGAACGCGTCTCC<br>CTGCGCGAT |
| attJ_R                     | ATCGCGCAGGGAGACGCGTTCGGAAAGCCGAATGCAGTCG<br>AATATTCAGG |

|                    |                                                         |
|--------------------|---------------------------------------------------------|
| <i>attJΔRbm_F</i>  | TCCCTCTCCTGAATATTCGACTGCACGCGTCTCCCTGCGCG<br>ATTCGGTTT  |
| <i>attJΔRbm_R</i>  | AAACCGAATCGCGCAGGGAGACGCGTGCAGTCGAATATTC<br>AGGAGAGGGA  |
| <i>hrpRS_F</i>     | TAAGCAGGTGGGCTTTTGTTCGGATTGCCGAATGCGATGA<br>TGACTAAATG  |
| <i>hrpRS_R</i>     | CATTTAGTCATCATCGCATTTCGGCAATCCGAACAAAAGCC<br>CACCTGCTTA |
| <i>hrpRSΔRbm_F</i> | AATAGTCTAAGCAGGTGGGCTTTTGTGCGATGATGACTAA<br>ATGCCAGTAC  |
| <i>hrpRSΔRbm_R</i> | GTACTGGCATTTAGTCATCATCGCACAAAAGCCCACCTGCT<br>TAGACTATT  |

\*: Restriction sites used for cloning are underlined in oligonucleotides.
