# Supplementary material for: Ancient co-option of an amino acid ABC transporter locus in Pseudomonas syringae for host signal-dependent virulence gene regulation
Source: PubMed Central journal article supplement (PMC7386598; doi:10.1371/journal.ppat.1008680), 2020-07-16
Supplement: ppat.1008680.s018.pdf [file ppat.1008680.s018.pdf]

**S3 Table.** Metadata of *P. syringae* genomes and individual gene sequences used for phylogenetics

| Full_Name                  | Species_Name                                  | Isolate/strain | Assembly_Status | Assembly_Accessi | AatJ_Locus           | AauR_Locus           | HrpR_Locus              | Phylogroup | Ref_for_Alignment? | Canonical T3SS? |
|----------------------------|-----------------------------------------------|----------------|-----------------|------------------|----------------------|----------------------|-------------------------|------------|--------------------|-----------------|
| P_aeruginosa_PAO1          | <i>Pseudomonas aeruginosa</i>                 | PAO1           | Complete Genome | GCA_00006765.1   | PA1342               | PA1335               | NA                      | 0          | N                  | N               |
| P_fluorescens_Pf0-1        | <i>Pseudomonas fluorescens</i>                | Pf0-1          | Complete Genome | GCA_000012445.1  | Pf101_4535           | Pf101_4540           | NA                      | 0          | N                  | N               |
| P_fluorescens_SBW25        | <i>Pseudomonas fluorescens</i>                | SBW25          | Complete Genome | GCA_000009225.1  | PFLU_1139            | PFLU_1134            | NA                      | 0          | N                  | N               |
| P_protegens_Pf-5           | <i>Pseudomonas protegens</i>                  | Pf-5           | Complete Genome | GCA_000012265.1  | PFL_4871             | PFL_4876             | NA                      | 0          | N                  | N               |
| P_putida_KT2440            | <i>Pseudomonas putida</i>                     | KT2440         | Complete Genome | GCA_000007565.2  | PP_1071              | PP_1066              | NA                      | 0          | N                  | N               |
| P_syringae_inb918          | <i>Pseudomonas syringae</i>                   | inb918         | Complete Genome | GCA_004006335.1  | CT157_23070          | CT157_23095          | NA                      | 0          | N                  | N               |
| P_cichorii_ICMP_1649       | <i>Pseudomonas cichorii</i>                   | ICMP 1649      | Scaffold        | GCF_003699995.1  | NA                   | ALQ47_RS04710        | NA                      | 11         | N                  | N               |
| P_cichorii_JBC1            | <i>Pseudomonas cichorii</i>                   | JBC1           | Complete Genome | GCA_000517305.1  | PCH70_40000          | PCH70_40050          | NA                      | 11         | N                  | N               |
| P_syringae_GAW0119         | <i>Pseudomonas syringae</i>                   | GAW0119        | Contig          | GCF_000737245.1  | IV01_RS16770         | IV01_RS16745         | NA                      | 12         | N                  | N               |
| P_savastanoi_ICMP_2236     | <i>Pseudomonas savastanoi</i>                 | ICMP 2236      | Scaffold        | GCF_003701285.1  | ALP94_RS02575        | ALP94_RS02550        | NA                      | 13         | N                  | N               |
| P_syringae_CC1557          | <i>Pseudomonas syringae</i>                   | CC1557         | Complete Genome | GCA_000452705.3  | N018_05975           | N018_05950           | Un-annotated in GenBank | 10b        | N                  | Y               |
| P_syringae_UB0390          | <i>Pseudomonas syringae</i>                   | UB0390         | Contig          | GCF_000737225.1  | IV03_RS06245         | IV03_RS06270         | NA                      | 2c         | N                  | N               |
| P_viridiflava_CFBP_1590    | <i>Pseudomonas viridiflava</i>                | CFBP 1590      | Complete Genome | GCA_900184295.1  | CFBP1590_1386        | CFBP1590_1381        | NA                      | 7a         | N                  | N               |
| P_viridiflava_ICMP_2848    | <i>Pseudomonas viridiflava</i>                | ICMP 2848      | Scaffold        | GCF_001642795.1  | AO065_RS18900        | AO065_RS18875        | NA                      | 7a         | N                  | N               |
| P_viridiflava_TA043        | <i>Pseudomonas viridiflava</i>                | TA043          | Scaffold        | GCF_000452485.1  | N030_RS0127095       | N030_RS0127120       | NA                      | 7a         | N                  | N               |
| P_viridiflava_ICMP_8820    | <i>Pseudomonas viridiflava</i>                | ICMP 8820      | Contig          | GCF_002723575.1  | AO275_RS00865        | AO275_RS00890        | NA                      | 7b         | N                  | N               |
| P_syringae_ATCC_10859      | <i>Pseudomonas syringae</i>                   | ATCC 10859     | Complete Genome | GCA_001482725.1  | ACA40_19380          | ACA40_19405          | ACA40_06030             | 2          | N                  | Y               |
| P_syringae_CFBP3840        | <i>Pseudomonas syringae</i>                   | CFBP3840       | Complete Genome | GCA_900235815.1  | CFBP3840_01258       | CFBP3840_01253       | CFBP3840_04094          | 3          | N                  | Y               |
| P_syringae_CFBP6109        | <i>Pseudomonas syringae</i>                   | CFBP6109       | Complete Genome | GCA_900235885.1  | CFBP6109_00894       | CFBP6109_00888       | CFBP6109_04871          | 3          | N                  | Y               |
| P_amygdali_M301315         | <i>Pseudomonas amygdali</i>                   | M301315        | Complete Genome | GCA_000146005.2  | PLA107_006305        | PLA107_006280        | PLA107_018915           | 3          | N                  | Y               |
| P_savastanoi_1448A_BAA-978 | <i>Pseudomonas savastanoi</i>                 | 1448A; BAA-9   | Complete Genome | GCA_000012205.1  | PSPPH_3902           | PSPPH_3907           | PSPPH_1270              | 3          | Y                  | Y               |
| P_coronafaciens_ICMP8921   | <i>Pseudomonas coronafaciens</i>              | ICMP8921       | Scaffold        | GCF_001401235.1  | ALO38_RS25180        | ALO38_RS25155        | ALO38_RS01990           | 4          | N                  | Y               |
| P_coronafaciens_ICMP9088   | <i>Pseudomonas coronafaciens</i>              | ICMP9088       | Scaffold        | GCF_001400895.1  | ALO57_RS12770        | ALO57_RS12795        | ALO57_RS16785           | 4          | Y                  | Y               |
| P_coronafaciens_ICMP4457   | <i>Pseudomonas coronafaciens</i>              | ICMP4457       | Scaffold        | GCF_001400695.1  | ALO66_RS08985        | ALO66_RS08960        | ALO66_RS13930           | 4          | N                  | Y               |
| P_coronafaciens_ICMP4323   | <i>Pseudomonas coronafaciens</i>              | ICMP4323       | Scaffold        | GCF_001400345.1  | ALO77_RS05930        | ALO77_RS05905        | ALO77_RS08370           | 4          | N                  | Y               |
| P_syringae_CC1513          | <i>Pseudomonas syringae</i>                   | CC1513         | Contig          | GCF_000452765.1  | N014_RS0208970       | N014_RS0208945       | N014_RS0216560          | 4          | N                  | Y               |
| P_syringae_YM7930          | <i>Pseudomonas syringae</i> group genomosp. 3 | YM7930         | Scaffold        | GCF_001293575.1  | AC507_RS10550        | AC507_RS10575        | AC507_RS03155           | 5          | N                  | Y               |
| P_cannabina_ICMP2823       | <i>Pseudomonas cannabina</i>                  | ICMP2823       | Scaffold        | GCF_001400175.1  | ALO81_RS24130        | ALO81_RS24105        | ALO81_RS06615           | 5          | N                  | Y               |
| P_syringae_ICMP15200       | <i>Pseudomonas syringae</i>                   | ICMP15200      | Scaffold        | GCF_001401375.1  | ALO83_RS11875        | ALO83_RS11850        | ALO83_RS14375           | 5          | N                  | Y               |
| P_syringae_ES4326          | <i>Pseudomonas syringae</i> group genomosp. 3 | ES4326         | Scaffold        | GCF_000145845.1  | PMA4326_RS05030      | NA                   | PMA4326_RS03600         | 5          | N                  | Y               |
| P_syringae_ICMP4531        | <i>Pseudomonas syringae</i> group genomosp. 7 | ICMP4531       | Scaffold        | GCF_001400835.1  | ALO68_RS19110        | ALO68_RS27035        | ALO68_RS10975           | 6          | N                  | Y               |
| P_caricapapayae_ICMP2855   | <i>Pseudomonas caricapapayae</i>              | ICMP2855       | Scaffold        | GCF_001400735.1  | ALO80_RS14230        | ALO80_RS03565        | ALO80_RS24090           | 6          | N                  | Y               |
| P_viridiflava_ICMP_19473   | <i>Pseudomonas viridiflava</i>                | ICMP 19473     | Scaffold        | GCF_003702045.1  | ALP40_RS10635        | ALP40_RS10660        | ALP40_RS13960           | 8          | N                  | Y               |
| P_syringae_CC1583          | <i>Pseudomonas syringae</i>                   | CC1583         | Contig          | GCF_000452665.1  | N020_RS0204970       | N020_RS0204945       | N020_RS0200000226055    | 10a        | Y                  | Y               |
| P_syringae_CC1466          | <i>Pseudomonas syringae</i>                   | CC1466         | Contig          | GCF_000452785.1  | N013_RS0201020       | N013_RS0200995       | N013_RS0200000226405    | 10b        | Y                  | Y               |
| P_syringae_DC3000          | <i>Pseudomonas syringae</i> group genomosp. 3 | DC3000         | Complete Genome | GCA_000007805.1  | PSPTO_4171           | PSPTO_4176           | PSPTO_1379              | 1a         | Y                  | Y               |
| P_syringae_ICMP_9617       | <i>Pseudomonas syringae</i>                   | ICMP 9617      | Chromosome      | GCF_000658965.1  | A250_RS19390         | A250_RS19420         | A250_RS06240            | 1b         | Y                  | Y               |
| P_syringae_NZ-45           | <i>Pseudomonas syringae</i>                   | NZ-45          | Complete Genome | GCA_001913215.1  | PsaNZ45_21750        | PsaNZ45_21780        | PsaNZ45_06775           | 1b         | N                  | Y               |
| P_syringae_CFBP6411        | <i>Pseudomonas syringae</i> group genomosp. 3 | CFBP6411       | Complete Genome | GCA_900235905.1  | CFBP6411_04297       | CFBP6411_04302       | CFBP6411_01334          | 1c         | Y                  | Y               |
| P_syringae_31R1            | <i>Pseudomonas syringae</i>                   | 31R1           | Chromosome      | GCF_900105295.1  | BLV36_RS14660        | BLV36_RS14685        | BLV36_RS00695           | 2a         | Y                  | Y               |
| P_syringae_Cit_7           | <i>Pseudomonas syringae</i>                   | Cit 7          | Scaffold        | GCA_000145825.1  | PSYCI7_01120         | PSYCI7_32071         | PSYCI7_05430            | 2a         | N                  | Y               |
| P_syringae_UMAF0158        | <i>Pseudomonas syringae</i>                   | UMAF0158       | Complete Genome | GCA_001281365.1  | PSYRMG_10370         | PSYRMG_10395         | PSYRMG_22330            | 2a         | N                  | Y               |
| P_syringae_PP1             | <i>Pseudomonas syringae</i>                   | PP1            | Complete Genome | GCA_000452445.3  | N032_20590           | N032_20615           | N032_07030              | 2b         | N                  | Y               |
| P_syringae_SM              | <i>Pseudomonas syringae</i>                   | SM             | Chromosome      | GCF_000412165.1  | PSSSM_RS06385        | PSSSM_RS06360        | PSSSM_RS19580           | 2b         | Y                  | Y               |
| P_syringae_Pss9097         | <i>Pseudomonas syringae</i>                   | Pss9097        | Complete Genome | GCA_002905815.2  | BKC06_020255         | BKC06_020280         | BKC06_006480            | 2d         | N                  | Y               |
| P_syringae_B728a           | <i>Pseudomonas syringae</i>                   | B728a          | Complete Genome | GCA_000012245.1  | Psyr_3908            | Psyr_3913            | Psyr_1190               | 2d         | Y                  | Y               |
| P_syringae_B301D           | <i>Pseudomonas syringae</i>                   | B301D          | Complete Genome | GCA_000988485.1  | PsyrB_20290          | PsyrB_20315          | PsyrB_06270             | 2d         | N                  | Y               |
| P_syringae_BS2730          | <i>Pseudomonas syringae</i>                   | BS2730         | Scaffold        | GCF_004362325.1  | BCD77_RS04560        | BCD77_RS04535        | BCD77_RS01810           | 5b         | N                  | Y               |
| P_syringae_0788_9          | <i>Pseudomonas syringae</i>                   | 0788_9         | Scaffold        | GCF_001293775.1  | ABJ99_RS07570        | ABJ99_RS07545        | ABJ99_RS21355           | 5c         | N                  | Y               |
| P_syringae_ICMP3956        | <i>Pseudomonas syringae</i> group genomosp. 3 | ICMP3956       | Scaffold        | GCF_001400635.1  | ALO52_RS13035        | ALO52_RS13060        | ALO52_RS09725           | 7a         | N                  | Y               |
| P_viridiflava_CFBP13507    | <i>Pseudomonas viridiflava</i>                | CFBP13507      | Contig          | GCF_005233675.1  | PviCFBP13507_RS07705 | PviCFBP13507_RS07680 | PviCFBP13507_RS04245    | 7a         | N                  | Y               |
| P_syringae_CC1417          | <i>Pseudomonas syringae</i>                   | CC1417         | Contig          | GCF_000452825.1  | N011_RS0209770       | N011_RS0209745       | N011_RS0203430          | 9a         | N                  | Y               |
| P_syringae_CC1524          | <i>Pseudomonas syringae</i>                   | CC1524         | Contig          | GCF_000452745.1  | N015_RS0212175       | N015_RS0212150       | N015_RS0216545          | 9a         | N                  | Y               |
| P_asturiensis_LMG_26898    | <i>Pseudomonas asturiensis</i>                | LMG 26898      | Scaffold        | GCF_900143095.1  | BUB69_RS20990        | BUB69_RS20965        | BUB69_RS06515           | 9b         | Y                  | Y               |
